# Supplementary material for: High-contrast electrochromic and electrofluorescent dual-switching materials based on 2-diphenylamine-(9,9-diphenylfluorene)-functionalized semi-aromatic polymers
Source: Royal Society of Chemistry journal article supplement (doi:10.1039/c6ra12174h), 2016-01-01
Supplement: c6ra12174h1.pdf [file c6ra12174h1.pdf]

## Supporting Information for

# High-contrast electrochromic and electrofluorescent dual-switching materials based on 2-diphenylamine-(9, 9-diphenylfluorene) – functionalized semi-aromatic polymers

### List of Contents for supporting Information:

|                                                                                        |   |
|----------------------------------------------------------------------------------------|---|
| Fig. S1 FTIR spectra of dinitro intermediate compound 1 and diamine monomer 2.....     | 1 |
| Fig. S2 FTIR spectra of the polymers.....                                              | 2 |
| Fig.S3 <sup>1</sup> H NMR spectra of the polymers in DMSO- <i>d</i> <sub>6</sub> ..... | 3 |
| Fig. S4 DSC curves of the polymers.....                                                | 4 |
| Fig. S5 UV-vis absorption of the polymer films.....                                    | 5 |

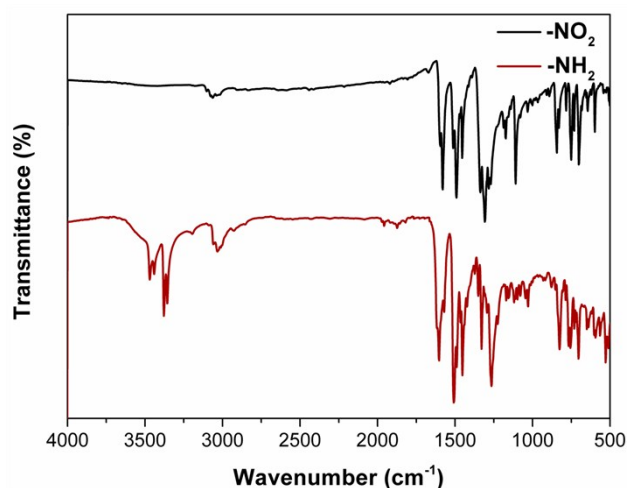

**Fig. S1** FTIR spectra of dinitro intermediate compound 1 and diamine monomer 2.

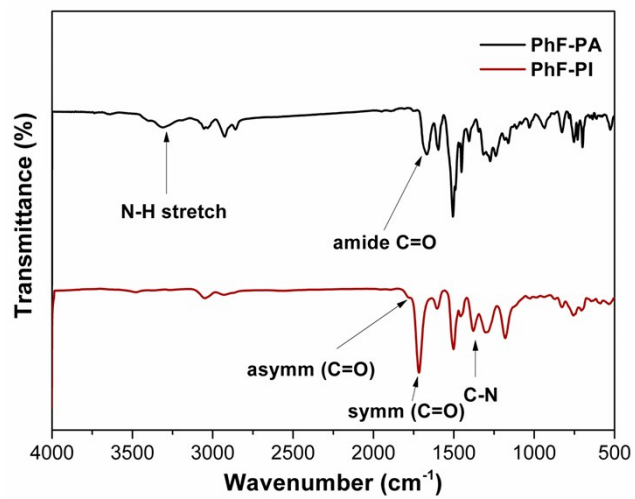

**Fig. S2** FTIR spectra of the polymers.

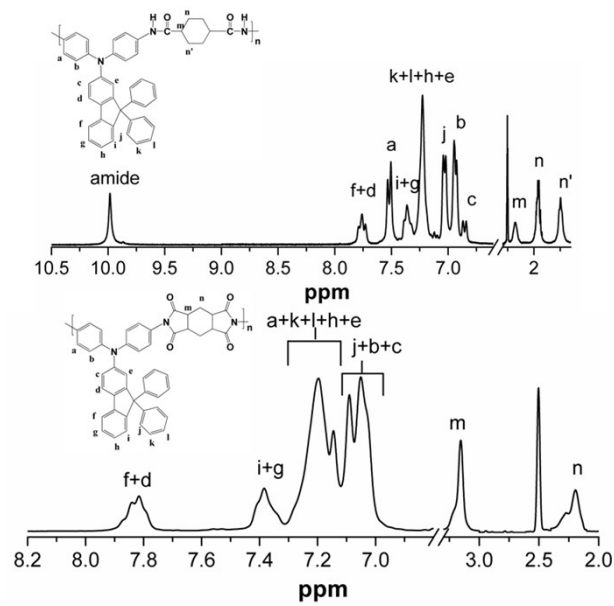

**Fig.S3**  $^1\text{H}$  NMR spectra of the polymers in  $\text{DMSO-}d_6$

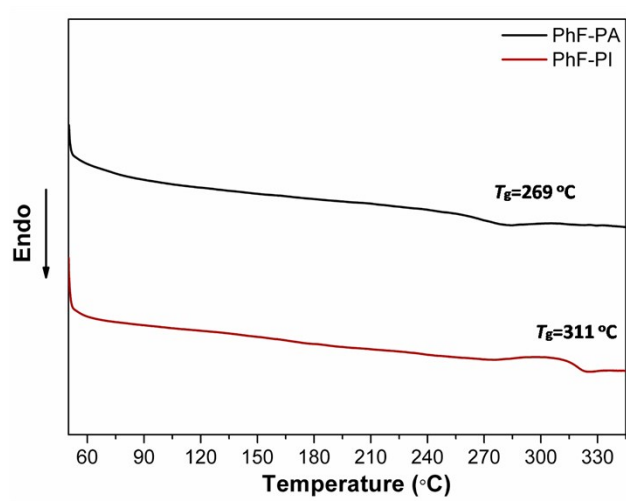

**Fig. S4** DSC curves of the polymers.

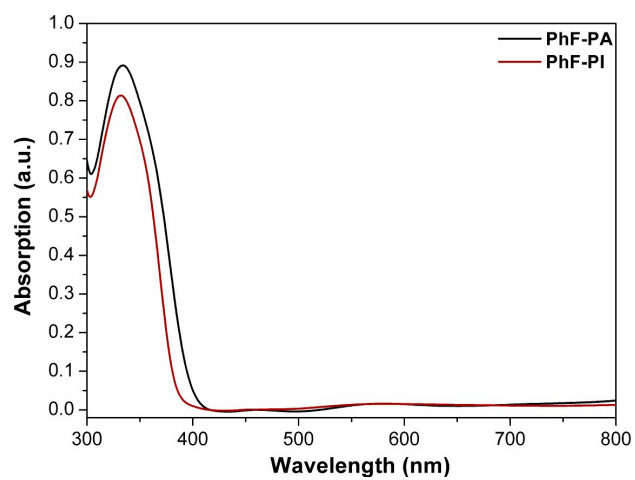

**Fig. S5** UV-vis absorption of the polymer films.
